# Supplementary material
Source: Springer Nature journal article supplement (https://www.springermedizin.de/resource/supplementary/13034_2008_26_MOESM1_ESM.pdf/9652162)
Supplement: MOESM1 [file 9652162]

-  <sub>1</sub> Not at all difficult (normal)
-  <sub>2</sub> Slightly difficult
-  <sub>3</sub> A little difficult
-  <sub>4</sub> Moderately difficult
-  <sub>5</sub> Rather difficult
-  <sub>6</sub> Very difficult
-  <sub>7</sub> Extremely difficult
